# Supplementary material for: Humanizing the dehumanized: A test of strategies
Source: Research Square preprint supplement (doi:10.21203/rs.3.rs-7330548/v1), 2025-09-23
Supplement: Supplementary file 1 [file 859ebdb351018589ec6043b9.pdf]

# Supplementary Materials for

## Humanizing the dehumanized: A test of strategies

**A., Kadambi<sup>1,2,3\*</sup>, S. M. Ringold<sup>1,2</sup>, S. Kamath<sup>1,2</sup>, N. Raman<sup>1,2</sup>, A. Jayashankar<sup>1,2</sup>, A. Damasio<sup>1</sup>,  
S. Narayanan<sup>4</sup>, J. Kaplan<sup>1</sup>, L. Aziz-Zadeh<sup>1,2</sup>.**

Corresponding author: [akadambi@ucla.edu](mailto:akadambi@ucla.edu)

1 Brain and Creativity Institute, Dornsife College of Letters, Arts and Sciences, University of Southern California,  
Los Angeles, CA, USA

2 USC Mrs. T.H. Chan Division of Occupational Science and Occupational Therapy, University of Southern  
California, Los Angeles, CA, USA

3 Psychiatry and Biobehavioral Sciences, David Geffen School of Medicine, University of California, Los Angeles,  
CA, USA

4 Google DeepMind, Zurich

# Supplementary Text

## S1 - Post > Pre humanization

( $Z > 2.3$ ,  $p < 0.01$ ; cluster corrected)

See Figure S1 for imaging results and Table S1 for peak coordinates

## S2 - Summary results for strategies 3.1, $p < .05$

The self-similarity strategy showed the largest activity patterns, notably in regions involved in mentalizing including the: ventromedial prefrontal cortex (vmPFC), bilateral middle temporal gyrus (MTG; notably in the posterior STS), bilateral precuneus, left inferior parietal lobule, left parahippocampal gyrus spanning the hippocampus, right hippocampus, right occipital pole, and right cerebellum.

Both universalism and competence strategies reflected similar (though less robust) activity patterns to self-similarity. Peak activity for each was observed in numerous brain regions commonly engaged during mentalizing and self-referential processing, including bilateral vmPFC, hippocampi, and middle temporal gyrus. For warmth, peak activity as compared to control spanned the right postcentral gyrus and superior parietal lobule/BA5, bilateral parietal opercula into the central opercula and insula, vmPFC, and anterior cingulate cortex. For sensorimotor simulation, peak activity as compared to control was found in the bilateral hippocampi, vmPFC, and posterior cingulate.

## S3 - Multiple Regression Results for each strategy

In *Section 2.2.3*, we examined neural activity in the ROIs (bilateral posterior insula, parietal and central opercula, and vmPFC) during the humanization strategies and related them to participant prosocial attitudes and internal feelings towards the unhoused. Here we report the full results for the multiple regression models that were fit to each ROI and strategy for predictor selection and corrected for multiple comparisons using the Benjamin-Hochberg FDR procedure (within ROI).

For the bilateral vmPFC, the models were initially significant for competence (*Left*:  $F(3,36)=3.133$ ,  $p=.037$ , adjusted  $R^2=.141$ ; *Right*:  $F(1,38)=7.594$ ,  $p=.009$ , adjusted  $R^2=.145$ ), predicted by difference scores in ATHI solutions ( $b=11.159$ ,  $p=.009$ , 95% CI: [2.962, 19.357]) in the right hemisphere and difference scores in ATHI solutions ( $b=9.307$ ,  $p=.025$ , 95% CI: [1.255, 17.360]), BOQ ( $b=2.886$ ,  $p=.097$ , 95% CI: [-.550, 6.322]), and IOS ( $b=-12.499$ ,  $p=.058$ , 95% CI: [-25.432, .435]) in the left hemisphere. However, only the right hemisphere model maintained significance after multiple comparisons correction (*Right*:  $p_{adj}=.027$ ). Follow-up Spearman correlations confirmed the relationship between the difference scores in ATHI solutions and right vmPFC activity during the competence strategy ( $\rho=.391$ ,  $p=.013$ , 95% CI: [.081, .632]) and a trending relationship with the left hemisphere ( $\rho=.295$ ,  $p=.065$ , 95% CI: [-.028, .562]). No significant models were found for warmth (*Left*:  $p=.143$ ; *Right*:  $p=.077$ ) or self-similarity (*Left*:  $p=.064$ ; *Right*:  $p=.076$ ).

For the parietal operculum, the model was significant for self-similarity in the right hemisphere ( $F(2,37)=5.933$ ,  $p_{adj}=.018$ , adjusted  $R^2=.202$ ), with IRI perspective-taking ( $b=3.336$ ,  $p=.032$ , 95% CI: [.300, 6.373]) and difference scores in BOQ ( $b=3.048$ ,  $p=.033$ , 95% CI: [.259, 5.838]) as significant predictors. Follow-up Spearman correlations confirmed the positive

relationship between ATHI SC and right parietal operculum activity ( $p=.421$ ,  $p=.007$ , 95% CI: [.117, .653]). The model was not significant in the left hemisphere ( $p=.112$ ). For competence, the model was initially significant in the left hemisphere (left  $p=.043$ ), predicted by difference scores in ATHI Affiliation and IOS, as well as IRI perspective-taking. However, the model did not maintain significance after the multiple comparisons correction ( $p_{adj}=.0645$ ), and was not significant in the right hemisphere (right:  $p=.064$ ). For warmth, both hemisphere models were initially significant. The left hemisphere was predicted by IRI Personal distress (PD),  $F(1,38)=5.759$ ,  $p=.021$ , adjusted  $R^2=.109$ , which did not survive multiple comparisons correction (Left:  $p_{adj}=.0630$ ). The right hemisphere was predicted by IRI PD and difference scores in ATHI Solutions,  $F(2,37)=4.046$ ,  $p_{adj}=.039$  adjusted  $R^2=.135$ . Follow-up Spearman correlations were marginal between IRI PD and parietal operculum activity during warmth (Left:  $\rho=-.302$ ,  $p=.058$ , 95% CI: [-.568, .020]; Right:  $\rho=-.293$ ,  $p=.066$ , 95% CI: [-.561, .029]).

For the central operculum, the model was significant for warmth in the right hemisphere,  $F(4,35)=3.679$ ,  $p_{adj}=.0195$ , adjusted  $R^2=.216$ , predicted by difference scores in ATHI Affiliation ( $b=4.396$ ,  $p=.078$ , 95% CI: [-.515, 9.307]), trait IRI Empathic Concern ( $b=2.761$ ,  $p=.011$ , 95% CI: [.684, 4.839]), trait IRI Personal Distress ( $b=-1.973$ ,  $p=.003$ , 95% CI: [-3.244, -.702]), and trait PBIS ( $b=-9.563$ ,  $p=.050$ , 95% CI: [-19.113, -.013]). The model was not significant in the left hemisphere for warmth ( $p=.089$ ), nor bilaterally for competence (Left:  $p=.203$ ; Right:  $p=.294$ ). For self-similarity, the models were initially significant for both hemispheres (Right:  $F(1,38)=7.110$ ,  $p_{adj}=.0195$ , adjusted  $R^2=.135$ ; Left:  $F(1,38)=4.769$ ,  $p=.035$ , adjusted  $R^2=.088$ ), predicted by BOQ difference scores (Right:  $b=4.706$ ,  $p=.011$ , 95% CI: [1.133, 8.280]; Left:  $b=4.606$ ,  $p=.035$ , 95% CI: [.336, 8.875]). Follow-up Spearman correlations confirmed the relationship with BOQ difference scores in the right hemisphere ( $\rho=.330$ ,  $p=.038$ , 95% CI: [.011, .588]). The left hemisphere did not maintain significance after multiple comparisons correction (Left:  $p_{adj}=.105$ ).

For the posterior insula, the model was significant for warmth in the right hemisphere,  $F(3,36)=3.453$ ,  $p=.026$ , adjusted  $R^2=.159$ , predicted by differences in ATHI Solution ( $b=2.853$ ,  $p=.041$ , 95% CI: [.117, 5.590]), ATHI Structural Causation ( $b=1.949$ ,  $p=.114$ , 95% CI: [-.490, 4.389]), and negatively by IRI personal distress ( $b=-1.071$ ,  $p=.033$ , 95% CI: [-2.053, -.090]). Follow-up Spearman correlations only confirmed the relationship with ATHI Solution difference scores ( $\rho=.360$ ,  $p=.023$ , 95% CI: [.045, .610]). However, while informative for predictor selection, the model did not maintain significance after the multiple comparisons correction ( $p_{adj}=.078$ ). No other models were significant for warmth (Left:  $p=.059$ ), nor for the other strategies: competence (Left:  $p=.221$ ; Right:  $p=.099$ ), self-similarity (Left:  $p=.101$ ; Right:  $p=.223$ ).

## S4 - Demographic Information Collected

1. DOB
2. Race and Ethnicity : (select 1)
  - a. White/Caucasian
    - i. Specify:
  - b. Black/African American
  - c. Asian:
    - i. Specify:
  - d. Native American/American Indian
    - i. Specify:
  - e. Pacific Islander

- i. Specify:
  - f. Hispanic/Latino
    - i. Specify:
  - g. Middle Eastern/North African:
    - i. Specify:
  - h. Multiracial:
    - i. Specify:
  - i. Prefer not to say
    - i. Other:
- 3. What are your **ethnic origins or ancestry**? Select **all geographic areas** from which you originated.
  - a. Western Europe (e.g., Greece, Sweden, United Kingdom)
  - b. Eastern Europe (e.g., Hungary, Poland, Russia)
  - c. North Africa (e.g., Egypt, Morocco, Sudan)
  - d. Sub-Saharan Africa (e.g., Kenya, Nigeria, South Africa)
  - e. West Asia / Middle East (e.g., Iran, Israel, Saudi Arabia)
  - f. South and Southeast Asia (e.g., India, Indonesia, Singapore)
  - g. East and Central Asia (e.g., China, Japan, Uzbekistan)
  - h. Pacific / Oceania (e.g., Australia, Fiji, Papua New Guinea)
  - i. North America (Canada, United States)
  - j. Central America and Caribbean (e.g., Jamaica, Mexico, Panama)
  - k. South America (e.g., Brazil, Chile, Colombia)
  - l. Self describe
  - m. I prefer not to disclose
- 4. Biological Sex
  - a. Male
  - b. Female
- 5. Gender Identity:
  - a. Cisgender Female / Woman
  - b. Cisgender Male / Man
  - c. Genderqueer / Gender non-binary / Gender fluid
  - d. Transgender Female/ Woman
  - e. Transgender Male / Man
  - f. A gender not listed
  - g. Prefer not to say
- 6. Sexual Orientation:
  - a. Heterosexual/ Straight
  - b. Homosexual / Lesbian- Gay
  - c. Bisexual
  - d. Pansexual
  - e. Asexual
  - f. Queer
  - g. Not listed
  - h. Prefer not to say
- 7. Are your parents (adoptive or biological) alive?
  - a. Yes-both
  - b. No-both
  - c. No 1 parent is deceased (branching-specify)
- 8. Are you a first generation U.S. citizen?

- a. If no- Are you a second generation U.S. citizen? [field note: your parent(s) immigrated to the US]
  - b. If no- Are you a third generation U.S. citizen? [field note: your grandparent(s) immigrated to the US]
  - c. If no- are you a fourth generation U.S. citizen? [field note: your great- grandparent(s) immigrated to the US]
  - d. If yes to any question, what country did they immigrate from?
9. Education level- Self
  - a. Less than 8th grade
  - b. Some high school
  - c. High school diploma/GED add field note: if you are an undergraduate student, select this
  - d. College degree (AA, BA, BS)
  - e. Some graduate school
  - f. Graduate school degree
  - g. Other ((branching-specify)
10. Education level- Parent (give options for 2 parents)
  - a. Less than 8th grade
  - b. Some high school
  - c. High school diploma/GED
  - d. College degree (AA, BA, BS)
  - e. Some graduate school
  - f. Graduate school degree
  - g. Other ((branching-specify)
11. Marital status- self
  - a. Single
  - b. Married
  - c. Separated
  - d. Divorced
  - e. Remarried
  - f. Widowed
  - g. Decline to answer
12. Marital status- Parents
  - a. Single
  - b. Married
  - c. Separated
  - d. Divorced
  - e. Remarried
  - f. Widowed
  - g. Decline to answer
13. Number of siblings
14. Number of children
15. What is your current Religion?
  - a. Protestant
  - b. Roman Catholic
  - c. Mormon
  - d. Orthodox such as Greek or Russian Orthodox
  - e. Jewish
  - f. Muslim
  - g. Buddhist
  - h. Hindu
  - i. Atheist

- j. Agnostic
- k. Shinto
- l. Tao
- m. Something else (specify)
- n. Nothing in particular
- 16. What was your Religion of upbringing??
  - a. Protestant
  - b. Roman Catholic
  - c. Mormon
  - d. Orthodox such as Greek or Russian Orthodox
  - e. Jewish
  - f. Muslim
  - g. Buddhist
  - h. Hindu
  - i. Atheist
  - j. Agnostic
  - k. Shinto
  - l. Tao
  - m. Something else (specify)
  - n. Nothing in particular
- 17. Employment status-self
  - a. Not employed
  - b. Employed part time
  - c. Employed full time
  - d. Employed full time and have a second job
- 18. Occupation-Self (short answer)
- 19. Employment status-Parents (give options for 2)
  - a. Not employed
  - b. Employed part time
  - c. Employed full time
  - d. Employed full time and have a second job
  - e. N/A- Deceased
- 20. Occupation-Parents (short answer, give options for 2)
- 21. Income-self
  - a. Under \$25,000
  - b. \$25,000-\$49,000
  - c. \$50,000-\$74,000
  - d. \$75,000-\$99,000
  - e. \$100,000-\$124,000
  - f. Over \$125,000
- 22. Income- Parents
  - a. Under \$25,000
  - b. \$25,000-\$49,000
  - c. \$50,000-\$74,000
  - d. \$75,000-\$99,000
  - e. \$100,000-\$124,000
- 23. Home Zip code
- 24. Current Zip code
- 25. Other languages spoken at home (give multiple options
  - a. Language (give options for 3 languagesbranching-% spoken at home
- 26. How many extracurricular activities do you participate in? (drop down up to 5)

- a. Branching- list extracurricular activity 1 (short answer)- give up to 5 options
27. What is your favorite hobby?
  28. What is your favorite food?
  29. What is your favorite sport?
  30. What is your favorite professional sports team?
  31. What city are you from?
  32. Who is your favorite singer?
  33. What is your favorite genre of music?
  34. What is your favorite movie?
  35. What is your favorite TV show?
  36. What is your favorite Starbucks drink?
  37. Do you identify with any of the following groups? (select all that apply)
    - a. Middle class
    - b. White people
    - c. Christians
    - d. Black people
    - e. Muslims
    - f. Rich people
    - g. Asian people
    - h. Jewish people
    - i. Hispanic people
    - j. Gay people
    - k. Elderly people
    - l. Disabled people
    - m. Poor people
    - n. Homeless people
    - o. Drug addicts
    - p. Atheists
  38. Do you play first person video games?
    - a. If yes, How often do you play video games?
    - b. If yes, do you play on a computer or gaming console?

## **5 - Qualitative Descriptions ( $N = 14$ ) on Ingroup-outgroup Bonding Questionnaire (BOQ) Piloting**

Table S2 for participant responses to BOQ piloting

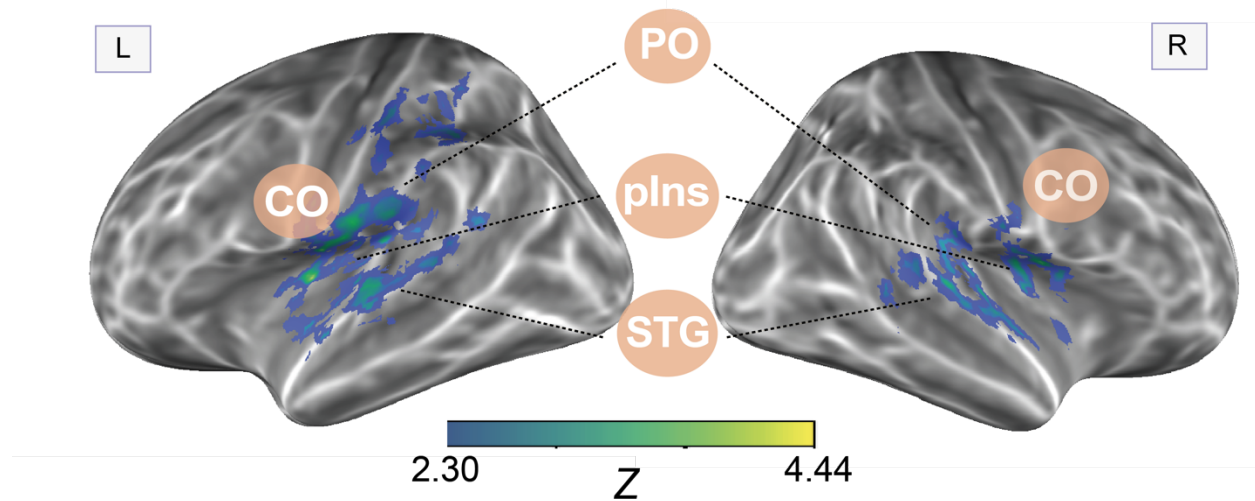

**Fig S1. Brain regions showing greater signal post-humanization compared with pre-humanization for the unhoused.** This analysis showed increased signal in regions associated with social pain following humanization. Peak activity identified in the left parietal operculum/S2 and right central opercula/insula when viewing photos of unhoused individuals after humanization versus before humanization ( $Z > 2.3$ ,  $p < .01$ , cluster corrected). Peak cluster and subcluster voxels are reported above.

**Table S1. Peak cluster and subcluster voxels for unhoused post-humanization > unhoused pre-humanization**

| Cluster Index | Hemisphere | Area               | MNI (X, Y, Z) | Z-MAX | Cluster Size (Voxels) | P Value  |
|---------------|------------|--------------------|---------------|-------|-----------------------|----------|
| 2             | Left       | Insula             | -38,-10,12    | 4.44  | 2956                  | 1.85e-10 |
|               |            | Parietal Operculum | -36,-30,24    | 3.98  |                       |          |
|               |            | Parietal Operculum | -34,-34,22    | 3.85  |                       |          |
|               |            | Central Operculum  | -58,-18,18    | 3.61  |                       |          |
|               |            | Parietal Operculum | -54,-18,8     | 3.60  |                       |          |
|               |            | Central Operculum  | -50,-14,14    | 3.53  |                       |          |
| 1             | Right      | Central Operculum  | 46, 2, 12     | 3.70  | 1466                  | 4.23e-06 |



|                      |                |      |
|----------------------|----------------|------|
| IFG                  | 48,2,16        | 3.59 |
| STG                  | 68, -22,<br>10 | 3.52 |
| Insula               | 38,-8,10       | 3.49 |
| Central<br>Operculum | 48,-14,10      | 3.42 |

*Abbreviations: IFG, Inferior Frontal Gyrus; STG, Superior Temporal Gyrus*

**Table S2. Ingroup/Outgroup (BOQ) bonding results.** A total of 15 pilot participants (research assistants naïve to the study's purpose) were included in the qualitative testing. One participant did not complete their responses for all videos, and hence was excluded, for a total of 14 pilot participants included in the table. Exclusion criteria for the question was based on the number of incorrect or discrepant interpretations for each question (highlighted in orange). Leftmost column denotes each BOQ question. Based on these pilot results, we removed the following questions: Question #3 ('I feel good about people who are homeless'), Question #6 ('I feel bad about people who are homeless'), Question #13 ('I think people who are homeless are cool').

| Question                                            | Sub1                                                                                                   | Sub2                                                                                         | Sub3                                                                        | Sub4                                                                                                                                | Sub5                                                       | Sub6                                                         | Sub7    | Sub8                                                            | Sub9                                                  | Sub10                                                  | Sub11                                                                                   | Sub12                                                                                                                                                  | Sub13                                                                                          | Sub14                                                                                    |
|-----------------------------------------------------|--------------------------------------------------------------------------------------------------------|----------------------------------------------------------------------------------------------|-----------------------------------------------------------------------------|-------------------------------------------------------------------------------------------------------------------------------------|------------------------------------------------------------|--------------------------------------------------------------|---------|-----------------------------------------------------------------|-------------------------------------------------------|--------------------------------------------------------|-----------------------------------------------------------------------------------------|--------------------------------------------------------------------------------------------------------------------------------------------------------|------------------------------------------------------------------------------------------------|------------------------------------------------------------------------------------------|
| <b>I feel connected to people who are homeless.</b> | Asking about if someone feels a relationship/sense of empathy/familiarity with people who are homeless | How much does an individual feel like they relate to or are associated with homeless people. | I feel empathy for the homeless and want to help them in any way that I can | It's asking whether I feel like I am of the same 'type' of person as those who are homeless, that I might be able to relate to them | Do you feel an association or relation to homeless people? | I feel empathy or I feel similarly to those who are homeless | empathy | Do I feel a sense of understanding for people who are homeless? | Can I relate to/empathize with those who are homeless | I have an emotional link with people who are homeless. | I think this question is asking what kind of a relationship you have to homeless people | This question means that I feel and resonate with those who are homeless and I might even be able to relate to them or show more empathy towards them. | How much a person feels a deeper sameness with a homeless individual, and feels a kinship with | Do I feel like I can relate to them? Do I feel that I can have a conversation with them? |

|                                                              |                                                                                  |                                                                                                         |                                                                                       |                                                                                             |                                                                             |                                                              |            |                                                                  |                                                                |                                                                     |                                                                            |                                                                                                             |                                                                                                                                                                                                                                                                               |                                                                                                                                                            |
|--------------------------------------------------------------|----------------------------------------------------------------------------------|---------------------------------------------------------------------------------------------------------|---------------------------------------------------------------------------------------|---------------------------------------------------------------------------------------------|-----------------------------------------------------------------------------|--------------------------------------------------------------|------------|------------------------------------------------------------------|----------------------------------------------------------------|---------------------------------------------------------------------|----------------------------------------------------------------------------|-------------------------------------------------------------------------------------------------------------|-------------------------------------------------------------------------------------------------------------------------------------------------------------------------------------------------------------------------------------------------------------------------------|------------------------------------------------------------------------------------------------------------------------------------------------------------|
| <b>I feel on the same team with people who are homeless.</b> | Asking about a sense of camaraderie and partnership with people who are homeless | How much does an individual feel like they have common interests with homeless people and support them. | I believe that in order to make the world a better place, I have to help the homeless | Whether homeless people and I share some common enemy (e.g., the state? society?)           | Do you feel like you share common goals and interests with homeless people? | I feel empathy or I feel similarly to those who are homeless | solidarity | Do I feel I am in the same situation as someone who is homeless? | Can I show support or be supportive to people who are homeless | I am up against the same things as people who are homeless.         | I think this means if you can work with homeless people well               | I think this question means that I feel on the same level and feel the same perspective as homeless people. | if a person feels as though they have the same general goals and aims for life and society as a whole as an individual that is homeless                                                                                                                                       | Are we working toward the same goals? Do we work together? Being on the same team makes me think of helping each other, or having a symbiotic relationship |
| <b>I feel good about people who are homeless.</b>            | Asking about positive feelings regarding people who are homeless/homelessness    | How much an individual has either negative or positive feelings about homeless people                   | I feel safe around people who are homeless                                            | Whether I am satisfied with the state of being homeless that some people find themselves in | Do you feel like homeless people are good people?                           | I have a positive view of homeless people                    | compassion | Do I think homeless people's situations are adequate?            | Do I have positive views about unhoused individuals            | A pleasant feeling arises if I think about people who are homeless. | I think this is asking about your general attitude towards homeless people | I think this question means that my outlook on homeless people is positive and I am willing to help.        | I'm not exactly sure, I'd say it's like how good you feel about the state of homelessness and the level of which there are homeless people? I don't know if that makes sense, but like in my head you would feel good about people who are homeless if the amount of homeless | I feel positively about homeless people. I feel good about the situation they are in.                                                                      |

|                                                                    |                                                                                                                |                                                                                                             |                                                                                |                                                                                                   |                                                                                  |                                                    |                         |                                                                     |                                                                         |                                                                       |                                                                             |                                                                                                    |                                                                                                                           |                                                                                                                           |
|--------------------------------------------------------------------|----------------------------------------------------------------------------------------------------------------|-------------------------------------------------------------------------------------------------------------|--------------------------------------------------------------------------------|---------------------------------------------------------------------------------------------------|----------------------------------------------------------------------------------|----------------------------------------------------|-------------------------|---------------------------------------------------------------------|-------------------------------------------------------------------------|-----------------------------------------------------------------------|-----------------------------------------------------------------------------|----------------------------------------------------------------------------------------------------|---------------------------------------------------------------------------------------------------------------------------|---------------------------------------------------------------------------------------------------------------------------|
|                                                                    |                                                                                                                |                                                                                                             |                                                                                |                                                                                                   |                                                                                  |                                                    |                         |                                                                     |                                                                         |                                                                       |                                                                             |                                                                                                    | people dropped dramatically, so that I'd feel good that there's less homeless people                                      |                                                                                                                           |
| <b>I think I am similar to people who are homeless in general.</b> | Asking about a sense of similarity/community with people who are homeless (regardless of their being homeless) | How much an individual feels they have similar qualities, like passions, etc                                | My likes, dislikes, and characteristics are similar to people who are homeless | Whether homeless people and I share some common physical, psychological traits or circumstances   | I generally feel like I have similar interests and lifestyle to homeless people. | I am similar experiences to those who are homeless | self perception         | Am I in the same situation as people who are homeless?              | Can I relate to unhoused individuals                                    | I share personality traits or interests with people who are homeless. | This is asking you to think about qualities of homeless people and yourself | I think this question means that I have similarities to those who are homeless                     | How much you think you have things in common with someone that is homeless, on an interest, belief, life experience, etc. | I think I have similar traits to homeless people. We live similar lives, have similar concerns, have similar dreams, etc. |
| <b>I share the same goals as people who are homeless.</b>          | Asking what I think are the goals of people who are homeless and how similar they are to my own                | How much an individual feels their aspirations are similar to homeless people in general                    | I have similar goals in life to people who are homeless                        | Whether homeless people and I share the same kinds of ambitions (e.g., prosperity in life)        | I have common values and interests that homeless people do.                      | career aspirations                                 | believes and aspiration | Do I want to accomplish the same things as people who are homeless? | Do I think I have the same goals/aspirations and those who are homeless | I have similar motives and wants as people who are homeless.          | This asks you to think about the goals of homeless people                   | I think this question means that I have similar drive and determination as those who are homeless. | Do you have the same aims and wants in life as an individual that is homeless                                             | Are my goals the same as that of homeless people                                                                          |
| <b>I feel bad about people who are homeless.</b>                   | Asking about negative feelings regarding people who are homeless/homelessness                                  | How much empathy someone has for someone who is homeless (if the person believes it's their own fault, etc) | I feel sympathy for people who are homeless because they don't deserve it      | Whether I feel some kind of regret or shame about the state of homelessness that some people find | I feel badly for homeless people.                                                | I have empathy for the homeless                    | sympathy                | Do I feel sorry/sad for the homeless?                               | Do I feel sadness towards homeless individuals                          | I feel pity towards people who are homeless.                          | This asks about your own feelings towards homeless people                   | I think this question means that I have a soft spot for those who are homeless.                    | Do you have sympathy for and feel bad about the problem of homelessness and those who it affects                          | I pity them, I feel bad about their situation, Homelessness makes me feel bad                                             |

|                                                           |                                                                                              |                                                                                                                                 |                                                                                     |                                                                                                                             |                                                                                 |               |                |                                                                 |                                                                |                                                         |                                           |                                                                                                                                            |                                                                                                                                                                                                                                                                        |                                                                                                        |
|-----------------------------------------------------------|----------------------------------------------------------------------------------------------|---------------------------------------------------------------------------------------------------------------------------------|-------------------------------------------------------------------------------------|-----------------------------------------------------------------------------------------------------------------------------|---------------------------------------------------------------------------------|---------------|----------------|-----------------------------------------------------------------|----------------------------------------------------------------|---------------------------------------------------------|-------------------------------------------|--------------------------------------------------------------------------------------------------------------------------------------------|------------------------------------------------------------------------------------------------------------------------------------------------------------------------------------------------------------------------------------------------------------------------|--------------------------------------------------------------------------------------------------------|
|                                                           |                                                                                              |                                                                                                                                 |                                                                                     | themselves in                                                                                                               |                                                                                 |               |                |                                                                 |                                                                |                                                         |                                           |                                                                                                                                            |                                                                                                                                                                                                                                                                        |                                                                                                        |
| <b>I work well together with people who are homeless.</b> | Asking if I feel I can collaborate with people who are homeless and complete necessary tasks | How much someone feels they get along with someone who's homeless                                                               | I feel safe and am able to collaborate and share with people who are homeless       | Whether I can professionally collaborate with homeless people                                                               | If a homeless person and I did something together we would be strong teammates. | collaboration | collaboration? | Do I get along with homeless people if needed to work together? | Can I collaborate with people who are homeless                 | I collaborate easily with people who are homeless.      | This is very similar to the team question | I think this question means that I am able to work with those who are homeless and have no problem in doing so, because we are compatible. | Would you be able to benefit from collaborating with and working as a team towards a larger goal along with individuals that are homeless                                                                                                                              | I have positive experiences working with homeless people. We get along well, and make a good team.     |
| <b>I am united with people who are homeless.</b>          | Asking if I feel like I am joined/teamed up with people who are homeless                     | How much someone feels like they are connected to homeless people in their area and if the person feels like they support them. | People who are homeless are on the same team as I am in trying to improve the world | Whether I share the views of homeless people with respect to the challenges they face; whether I stand 'in solidarity with' | I stand by those who are homeless                                               | not sure      | solidarity?    | Do I feel connected with the homeless?                          | Can I show support or be supportive to people who are homeless | I am part of the same group as people who are homeless. | This is very similar to the team question | I think this question means I feel a sense of connection with those who are homeless.                                                      | Similar to question two, where if you have similar goals for society, but asking if United in my mind implies that you already have been working together along with homeless people to strive for that societal change, which is more beyond just thinking you having | I feel connected to homeless people; like we are one community. I feel a closeness to homeless people. |

|                                                                               |                                                                                                                                       |                                                                                                          |                                                              |                                                                                                                                                                                                                                                                                     |                                                                      |                                        |                 |                                                                                                 |                                                                   |                                                                                                                                                                       |                                                                                                                 |                                                                                                                    |                                                                                                                    |                                                                                                         |
|-------------------------------------------------------------------------------|---------------------------------------------------------------------------------------------------------------------------------------|----------------------------------------------------------------------------------------------------------|--------------------------------------------------------------|-------------------------------------------------------------------------------------------------------------------------------------------------------------------------------------------------------------------------------------------------------------------------------------|----------------------------------------------------------------------|----------------------------------------|-----------------|-------------------------------------------------------------------------------------------------|-------------------------------------------------------------------|-----------------------------------------------------------------------------------------------------------------------------------------------------------------------|-----------------------------------------------------------------------------------------------------------------|--------------------------------------------------------------------------------------------------------------------|--------------------------------------------------------------------------------------------------------------------|---------------------------------------------------------------------------------------------------------|
|                                                                               |                                                                                                                                       |                                                                                                          |                                                              |                                                                                                                                                                                                                                                                                     |                                                                      |                                        |                 |                                                                                                 |                                                                   |                                                                                                                                                                       |                                                                                                                 |                                                                                                                    | shared<br>intents                                                                                                  |                                                                                                         |
| <b>I don't like people who are homeless.</b>                                  | Asking if I dislike people who are homeless (because they are homeless)                                                               | Similar to number 3, how severe an individual's negative feelings are for someone homeless               | I do not enjoy being around homeless people                  | Whether I personally dislike people who are homeless, including holding negative beliefs or feeling emotionally negatively towards them                                                                                                                                             | I am not a fan of homeless people.                                   | I don't have empathy for homeless      | lack of empathy | Do I dislike people who are homeless?                                                           | I don't like people who are homeless.                             | I don't appreciate or enjoy people who are homeless.                                                                                                                  | I think this is asking about your general attitude towards homeless people                                      | I think this question means that I have a negative outlook on those who are homeless.                              | Do you like/dislike individuals that are homeless                                                                  | having disdain for homeless people                                                                      |
| <b>I would stick together with people who are homeless during challenges.</b> | Asking if I would remain on the same team/working with people who are homeless regardless of outside factors/unforeseen circumstances | Whether someone would support someone through their struggles if they were homeless or leave them alone. | I would help people who are homeless when they're in trouble | Whether, if I knew a homeless person personally or were actively involved in advocacy, I would take their side on issues where homeless people may end up perceivably negatively (e.g., overdosing on fentanyl in public, causing negative public perception from homeless people's | If a homeless person were going through something I would help them. | I have solidarity with homeless people | solidarity      | Would I continue to support the homeless through their challenges until the hardship has ended? | Would I support someone who is homeless while they are struggling | I would stay with people who are homeless during challenges in order to overcome them together (it would be more effective than working alone or with another group). | I think this is asking about your general attitude towards homeless people and also if you would work with them | I think this question means that I will always be there for those who are homeless, even when times are difficult. | if a homeless individual was going through something and had challenges, would you still continue to support them? | I would have homeless peoples' backs when they need it. I would act in solidarity with homeless people. |

|                                                       |                                                                                                   |                                                                                          |                                                             |                                                                                                                   |                                                            |                                 |            |                                                                    |                                                |                                                     |                                                                                                                 |                                                                                        |                                                          |                                                                                                    |
|-------------------------------------------------------|---------------------------------------------------------------------------------------------------|------------------------------------------------------------------------------------------|-------------------------------------------------------------|-------------------------------------------------------------------------------------------------------------------|------------------------------------------------------------|---------------------------------|------------|--------------------------------------------------------------------|------------------------------------------------|-----------------------------------------------------|-----------------------------------------------------------------------------------------------------------------|----------------------------------------------------------------------------------------|----------------------------------------------------------|----------------------------------------------------------------------------------------------------|
|                                                       |                                                                                                   |                                                                                          |                                                             | observable physical state). Whether I would choose to argue that things are 'not their fault', etc.               |                                                            |                                 |            |                                                                    |                                                |                                                     |                                                                                                                 |                                                                                        |                                                          |                                                                                                    |
| <b>I like people who are homeless.</b>                | Asking if I like people who are homeless (because they are homeless)                              | Similar to number 3, how much an individual has positive feelings toward homeless people | I enjoy being around people who are homeless                | Whether there are people I know who are homeless whom I like                                                      | I enjoy the presence and personalities of homeless people. | I have empathy for the homeless | empathy    | Do I like the personalities of people who are homeless?            | I like people who are homeless.                | I appreciate or enjoy people who are homeless.      | This asks about your own feelings towards homeless people                                                       | I think this question means that I have a positive outlook on when people are homeless | same but opposite question 9                             | I enjoy being around homeless people                                                               |
| <b>I would enjoy helping people who are homeless.</b> | Asking if I would like/feel rewarded by helping people who are homeless/doing service in some way | Whether someone would like to volunteer/support someone who's homeless                   | I want to help people who are homeless but I don't know how | Whether it would bring me pride or a sense of 'warm glow altruism' etc. to spend time helping out homeless people | I like to help those that are less privileged than me.     |                                 | solidarity | Would I enjoy helping the homeless and providing support for them? | I would enjoy helping people who are homeless. | Helping people who are homeless would bring me joy. | I think this is asking about your general attitude towards homeless people and also if you would work with them | I think this question means that I would like to help out those who are homeless.      | would you get enjoyment from helping out homeless people | I like helping the homeless community; I enjoy investing my time in helping the homeless community |

|                                   |                                                              |                                                              |                                                  |                                                             |                                |                              |                                                  |                                      |                                   |                                                               |                                                                            |                                                                                                                                                         |                                                            |                                                                                                     |
|-----------------------------------|--------------------------------------------------------------|--------------------------------------------------------------|--------------------------------------------------|-------------------------------------------------------------|--------------------------------|------------------------------|--------------------------------------------------|--------------------------------------|-----------------------------------|---------------------------------------------------------------|----------------------------------------------------------------------------|---------------------------------------------------------------------------------------------------------------------------------------------------------|------------------------------------------------------------|-----------------------------------------------------------------------------------------------------|
| People who are homeless are cool. | Asking if the condition of being homeless makes someone cool | Whether someone believes people who are homeless are likable | I think people who are homeless are great people | Whether it confers any sort of social status to be homeless | Homeless people are admirable. | I think they are interesting | I think people who are homeless are interesting? | Do I think homeless people are cool? | People who are homeless are cool. | I think people who are homeless are admirable or interesting. | I think this is asking about your general attitude towards homeless people | I think this question means that I find those who are homeless to be interesting and I never see them in a bad way, however, more in an intriguing way. | if people who are homeless are interesting and cool people | Homeless people are fashionable and funny and come off as relaxed? Homeless people have a cool vibe |
|-----------------------------------|--------------------------------------------------------------|--------------------------------------------------------------|--------------------------------------------------|-------------------------------------------------------------|--------------------------------|------------------------------|--------------------------------------------------|--------------------------------------|-----------------------------------|---------------------------------------------------------------|----------------------------------------------------------------------------|---------------------------------------------------------------------------------------------------------------------------------------------------------|------------------------------------------------------------|-----------------------------------------------------------------------------------------------------|

*Note: Orange highlighted cells denote incorrect or discrepant interpretations of the question*
